# Supplementary material for: Systemic but not MDSC-specific IRF4 deficiency promotes an immunosuppressed tumor microenvironment in a murine pancreatic cancer model
Source: Springer Nature journal article supplement (doi:10.1007/s00262-020-02605-9), 2020-05-24

Supplementary Figure S1

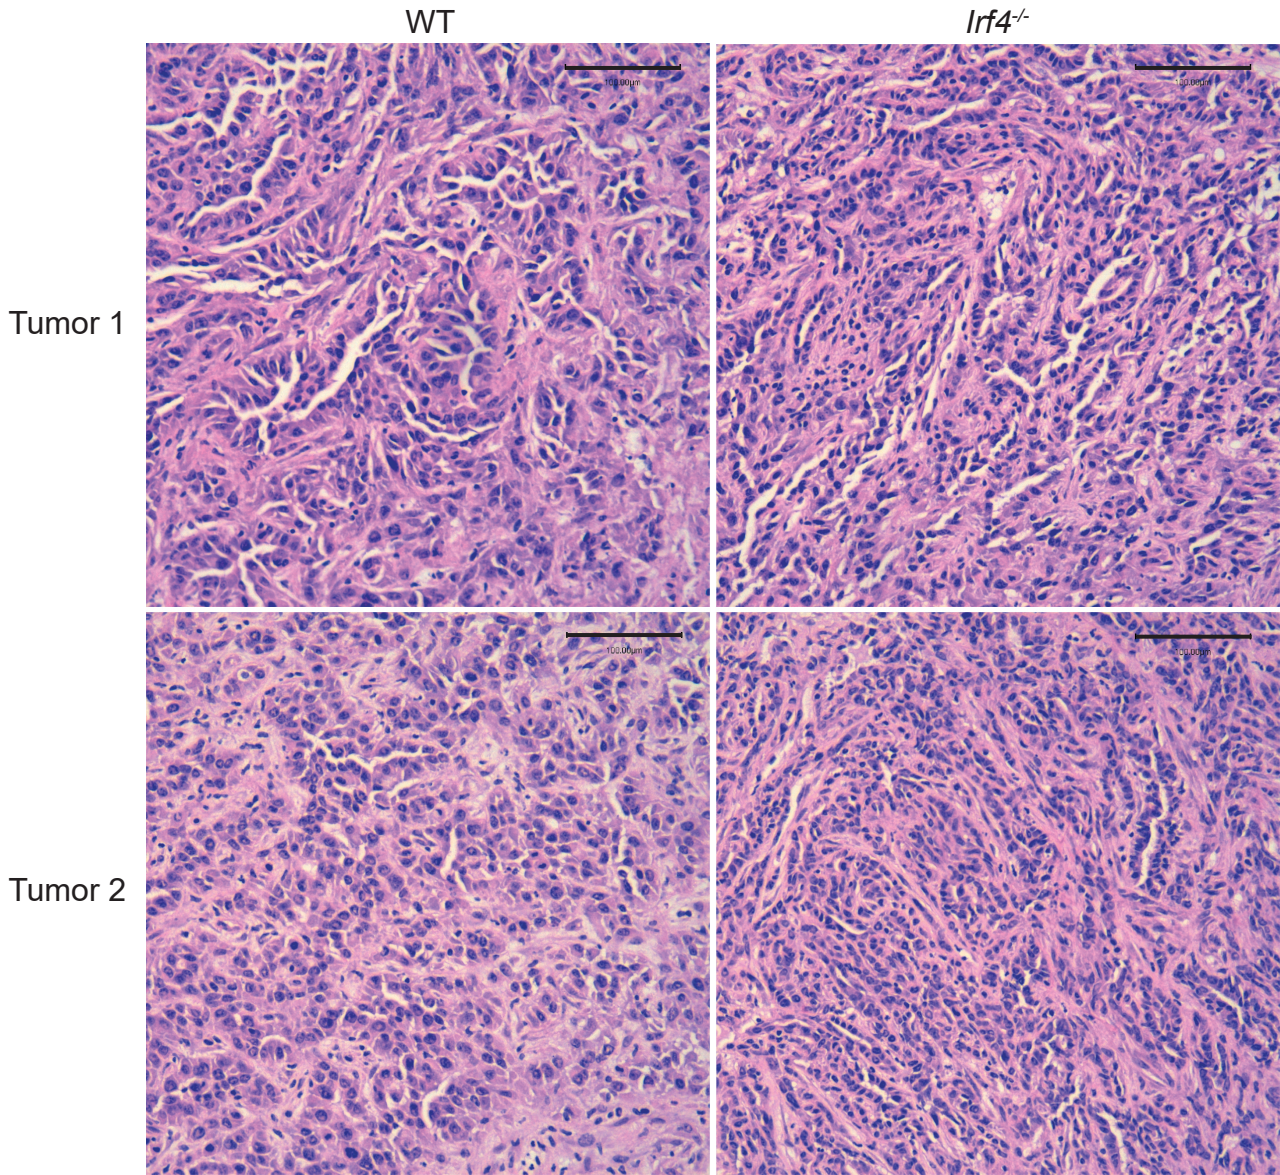

Supplement: MOESM1 [file 18008676]
