# Supplementary material for: Systemic but not MDSC-specific IRF4 deficiency promotes an immunosuppressed tumor microenvironment in a murine pancreatic cancer model
Source: Springer Nature journal article supplement (doi:10.1007/s00262-020-02605-9), 2020-05-24
Supplement: MOESM2 [file 18008676]

**Supplementary Table 1**

| Name             | Sequence 5`->3`           |
|------------------|---------------------------|
| Ly6G_wt_ctrl_fwd | GAGACTCTGGCTACTCATCC      |
| Ly6G_wt_ctrl_rev | CCTTCAGCAAGAGCTGGGGAC     |
| Ly6G_Cre_1_fwd   | GGTTTTATCTGTGCAGCCC       |
| Ly6G_Cre_rev     | GAGGTCCAAGAGACTTTCTGG     |
| Ly6G_Cre_2_fwd   | ACGTCCAGACACAGCATAGG      |
| IRF4-fl_geno1_fw | TGGGCACCTCTACTGTCTGG      |
| IRF4-fl_geno2_rv | CTCTGGGGACATCAGTCCT       |
| IRF4-fl_geno3_rv | CGACCTGCAGCCAATAAGC       |
| FLP_tg_geno1_fw  | TGCCGGTCCTATTTACTCGT      |
| FLP_tg_geno1_rv  | TACTTCTTTAGCGCAAGGGGTAG   |
| FLP_wt_geno1_fw  | CTAGGCCACAGAATTGAAAGATCT  |
| FLP_wt_geno1_rv  | GTAGGTGGAAATTCTAGCATCATCC |
| LysM_geno1_fw    | CCCAGAAATGCCAGATTACG      |
| LysM_geno_rv     | CTTGGGCTGCCAGAATTTCTC     |
| LysM_geno2_fw    | TTACAGTCGGCCAGGCTGAC      |
| IRF4-wt-for-A2   | TGCCTTTGGGACGGATGCTC      |
| IRF4-wt-rev-B2   | CTTCTAGCTGACCACTAAGAAC    |
| IRF4-Δftrt-rev-D | AATCAAGTGTGGGCAAGACTG     |

**Supplementary table 2**

| Genomic Locus             | Initial Denaturation | Denaturation     | Annealing        | Elongation       | Number of cycles | Final elongation |
|---------------------------|----------------------|------------------|------------------|------------------|------------------|------------------|
| <i>IRF4<sup>lox</sup></i> | 94 °C,<br>5 min      | 94 °C,<br>30 sec | 60 °C,<br>30 sec | 72 °C,<br>30 sec | 35               | 72 °C,<br>5 min  |
| <i>IRF4<sup>-/-</sup></i> | 95 °C,<br>5 min      | 95 °C,<br>15 sec | 62 °C,<br>30 sec | 72 °C,<br>60 sec | 30               | 72 °C,<br>5 min  |
| <i>LysM<sup>Cre</sup></i> | 94 °C,<br>5 min      | 94 °C,<br>20 sec | 60 °C,<br>15 sec | 72 °C,<br>15 sec | 25               | 72 °C,<br>2 min  |
| <i>Ly6G<sup>Cre</sup></i> | 94 °C,<br>5 min      | 94 °C,<br>30 sec | 60 °C,<br>30 sec | 72 °C,<br>60 sec | 35               | 72 °C,<br>10 min |
| <i>Ly6G<sup>WT</sup></i>  | 94 °C,<br>5 min      | 94 °C,<br>30 sec | 60 °C,<br>30 sec | 72 °C,<br>60 sec | 35               | 72 °C,<br>10 min |
| <i>FLP1</i>               | 94 °C,<br>5 min      | 94 °C,<br>20 sec | 60 °C,<br>15 sec | 72 °C,<br>15 sec | 25               | 72 °C,<br>2 min  |
